# Supplementary material for: Improving the representation of major Indian crops in the Community Land Model version 5.0 (CLM5) using site-scale crop data
Source: Copernicus journal article supplement (doi:10.5194/egusphere-2024-1431), 2024-06-25
Supplement: Supplementary file 1 [file egusphere-2024-1431-supplement.pdf]

Supplement to

# “Improving the representation of major Indian crops in Community Land Model (CLM) version 5.0 using site-scale crop data”

Reddy, K. N., et al.

Code changes to the CropType.F90 to include the latitudinal variation in base temperature for rice is:

```
Line no.
597     do p = begp, endp
598         if (this%croplive_patch(p)) then ! relative to planting date
599             ivt = patch%itype(p)
600             if ( (trim(this%baset_mapping) == baset_map_latvary) .and. &
601                 ((ivt == ns wheat) .or. (ivt == nirrig_swheat) .or. &
602                 (ivt == nrice) .or. (ivt == nirrig_rice) .or. &
603                 (ivt == nsugarcane) .or. (ivt == nirrig_sugarcane)) ) then
604                 rbufslp(p) = max(0._r8, min(pftcon%mxtmp(ivt), &
605                 t_ref2m_patch(p)-(SHR_CONST_TKFRZ + this%latbaset_patch(p)))) &
606                 * dtime/SHR_CONST_CDAY
607             else
608                 rbufslp(p) = max(0._r8, min(pftcon%mxtmp(ivt), &
609                 t_ref2m_patch(p)-(SHR_CONST_TKFRZ + pftcon%baset(ivt)))) &
610                 * dtime/SHR_CONST_CDAY
611             end if
612             if (ivt == nwwheat .or. ivt == nirrig_wwheat) then
613                 rbufslp(p) = rbufslp(p) * this%vf_patch(p)
614             end if
615         else
616             rbufslp(p) = accumResetVal
617         end if
618     end do
```

Table S1: Site scale data from Varma et al. (2023) used for base temperature sensitivity study (2000-2014)

| Site name   | Event IDs in PANGEA repository<br>(Varma et al., 2024)                                                                    | Latitude [°N] | Longitude [°E] | Altitude [m]<br>(above sea level) |
|-------------|---------------------------------------------------------------------------------------------------------------------------|---------------|----------------|-----------------------------------|
| Anantapur   | IND_RI_RED_2000, and<br>IND_RI_RED_2001*                                                                                  | 14.68         | 77.6           | 350                               |
| Cooch Behar | IND_SW_COB_2000, and<br>IND_SW_COB_2001*                                                                                  | 26.34         | 89.40          | 43                                |
| Faizabad    | IND_SW_FAZ_2002,<br>IND_SW_FAZ_2003, and<br>IND_SW_FAZ_2004*                                                              | 26.78         | 82.20          | 113                               |
| Hyderabad   | IND_RI_HYD_2010<br>IND_RI_JAB_2009,                                                                                       | 17.19         | 78.23          | 542                               |
| Jabalpur    | IND_RI_JAB_2010*, and<br>IND_RI_JAB_2011*                                                                                 | 24.49         | 80.58          | 412                               |
| Jobner      | IND_SW_JOB_2013                                                                                                           | 26.08         | 75.34          | 427                               |
| Kaul        | IND_RI_KAU_2008                                                                                                           | 29.51         | 76.41          | 241                               |
| Kuthulia    | IND_RI_KUT_2013                                                                                                           | 24.30         | 80.15          | 366                               |
| Ludhiana    | IND_SW_LUD_2011, and<br>IND_SW_LUD_2012*                                                                                  | 30.93         | 75.87          | 247                               |
| Meerut      | IND_SW_MEE_2011,<br>IND_SW_MEE_2012, and<br>IND_SW_MEE_2013*                                                              | 29.07         | 77.70          | 237                               |
| Nadia       | IND_SW_NAD_2000,<br>IND_SW_NAD_2001,<br>IND_SW_NAD_2002,<br>IND_SW_NAD_2008,<br>IND_SW_NAD_2009*, and<br>IND_SW_NAD_2013* | 22.88         | 89.00          | 10                                |
| Pantnagar   | IND_SW_PAN_2007,<br>IND_SW_PAN_2008*,<br>IND_RI_PAN_2011, and<br>IND_RI_PAN_2012*                                         | 29.00         | 79.48          | 244                               |
| Parbhani    | IND_SW_PAR_2001,<br>IND_SW_PAR_2005, and<br>IND_SW_PAR_2009*                                                              | 19.27         | 76.78          | 409                               |
| Raipur      | IND_RI_RAI_2009                                                                                                           | 21.40         | 81.39          | 293                               |

\* Site data used in validation. Remaining data is used in calibrating

Table S2: Sensitivity experiment values for CLM5\_Mod1 case. The values in bold font are the best performing parameter values.

| Parameter                       | Wheat      |                                                                       | Rice       |                                                               |
|---------------------------------|------------|-----------------------------------------------------------------------|------------|---------------------------------------------------------------|
|                                 | CLM5_Def   | Tested values                                                         | CLM5_Def   | Tested values                                                 |
| planting window<br>[mmdd, mmdd] | [401, 615] | [1015, 1130];<br>[1101,1215];<br><b>[1115,1231]</b> ;<br>[1130, 1231] | [101, 228] | [615, 731];<br><b>[701,815]</b> ;<br>[715,831];<br>[731, 915] |
| grnfill                         | 0.6        | 0.55, <b>0.6</b> , 0.65, 0.7,<br>0.75                                 | 0.4        | 0.45, 0.5, 0.55, 0.6,<br><b>0.65</b> , 0.7, 0.75              |
| hybgdd                          | 1700       | 1600, <b>1700</b> , 1800,<br>1900, 2000                               | 2100       | 1900, 2000, <b>2100</b> ,<br>2200, 2300                       |

Table S3: Base temperature at lowest bias observed during the sensitivity studies for wheat and rice

| Crop  | Site Name   | Latitude<br>[°N] | Base temperature @<br>lowest bias<br>[°C] |
|-------|-------------|------------------|-------------------------------------------|
| Wheat | Parbhani    | 19.16            | 8                                         |
|       | Nadia       | 22.95            | 7                                         |
|       | Faizabad    | 25.26            | 7                                         |
|       | Cooch Behar | 26.19            | 7                                         |
|       | Jobner      | 26.51            | 5                                         |
|       | Pantnagar   | 29.02            | 5                                         |
|       | Meerut      | 29.40            | 5                                         |
|       | Ludhiana    | 30.54            | 6                                         |
| Rice  | Anantapur   | 14.68            | 12                                        |
|       | Hyderabad   | 17.19            | 11                                        |
|       | Raipur      | 21.04            | 12                                        |
|       | Jabalpur    | 23.90            | 9                                         |
|       | Kuthulia    | 24.30            | 8                                         |
|       | Pantnagar   | 29.02            | 9                                         |
|       | Kaul        | 29.51            | 8                                         |

Table S4: Calibration and validation of wheat and rice simulated by CLM5 against site scale observations

| Parameter                             | Stage of model evaluation | Evaluation Metrics | Wheat |           |            |            | Rice |           |            |            |
|---------------------------------------|---------------------------|--------------------|-------|-----------|------------|------------|------|-----------|------------|------------|
|                                       |                           |                    | Obs   | CLM5_D ef | CLM5_Mo d1 | CLM5_Mod 2 | Obs  | CLM5_D ef | CLM5_Mo d1 | CLM5_Mod 2 |
| LAI (m <sup>2</sup> /m <sup>2</sup> ) | Calibration               | Mean of max. LAI   | 4.13  | 2.35      | 2.67       | 3.45       | 5.41 | 1.74      | 4.59       | 4.64       |
|                                       |                           | MAB                | --    | 0.81      | 0.51       | 0.45       | --   | 0.73      | 0.45       | 0.36       |
|                                       |                           | RMSE               | --    | 2.48      | 1.70       | 1.44       | --   | 3.25      | 2.15       | 1.71       |
|                                       |                           | <i>r</i>           | --    | -0.18     | 0.17       | 0.27       | --   | 0.05      | 0.33       | 0.47**     |
|                                       | Validation                | Mean of max. LAI   | 4.38  | 2.38      | 2.73       | 3.52       | 4.96 | 1.50      | 4.29       | 4.12       |
|                                       |                           | MAB                | --    | 0.83      | 0.52       | 0.40       | --   | 0.71      | 0.25       | 0.32       |
|                                       |                           | RMSE               | --    | 2.68      | 1.85       | 1.37       | --   | 3.10      | 1.35       | 1.59       |
|                                       |                           | <i>r</i>           | --    | -0.28*    | 0.03**     | 0.35**     | --   | 0.13      | 0.45       | 0.41       |
| Yield (t/ha)                          | Calibration               | Mean               | 3.87  | 2.92      | 3.60       | 3.50       | 4.57 | 2.66      | 3.69       | 3.47       |
|                                       |                           | MAB                | --    | 0.29      | 0.16       | 0.17       | --   | 0.70      | 0.26       | 0.29       |
|                                       |                           | RMSE               | --    | 1.30      | 0.85       | 0.90       | --   | 3.72      | 1.52       | 1.57       |
|                                       |                           | <i>r</i>           | --    | 0.28      | 0.33       | 0.30       | --   | -0.59     | -0.07      | -0.07      |
|                                       | Validation                | Mean               | 3.92  | 3.24      | 3.83       | 4.00       | 4.56 | 2.56      | 3.30       | 3.39       |
|                                       |                           | MAB                | --    | 0.17      | 0.13       | 0.22       | --   | 0.70      | 0.34       | 0.30       |
|                                       |                           | RMSE               | --    | 1.00      | 0.69       | 0.99       | --   | 3.93      | 1.88       | 1.71       |
|                                       |                           | <i>r</i>           | --    | 0.31      | 0.51       | 0.33       | --   | -0.96     | -0.01      | 0.30       |
| Growing season length (days)          | Calibration               | Mean               | 128   | 69        | 125        | 135        | 120  | 117       | 125        | 123        |
|                                       |                           | MAB                | --    | 0.46      | 0.11       | 0.09       | --   | 0.09      | 0.10       | 0.12       |
|                                       |                           | RMSE               | --    | 61.72     | 15.60      | 15.30      | --   | 13.64     | 14.62      | 18.13      |
|                                       |                           | <i>r</i>           | --    | 0.39      | 0.66*      | 0.62*      | --   | 0.04      | 0.09       | -0.67      |
|                                       | Validation                | Mean               | 131   | 69        | 128        | 138        | 115  | 112       | 121        | 119        |
|                                       |                           | MAB                | --    | 0.48      | 0.10       | 0.11       | --   | 0.05      | 0.05       | 0.07       |
|                                       |                           | RMSE               | --    | 64.76     | 15.66      | 15.68      | --   | 7.81      | 8.09       | 11.04      |
|                                       |                           | <i>r</i>           | --    | 0.44      | 0.66       | 0.62       | --   | 0.48      | 0.80*      | 0.51       |
| --                                    | Calibration               | Overall bias       | --    | 0.51      | 0.26       | 0.24       | --   | 0.51      | 0.27       | 0.26       |
|                                       | Validation                | Overall bias       | --    | 0.49      | 0.25       | 0.24       | --   | 0.49      | 0.21       | 0.23       |

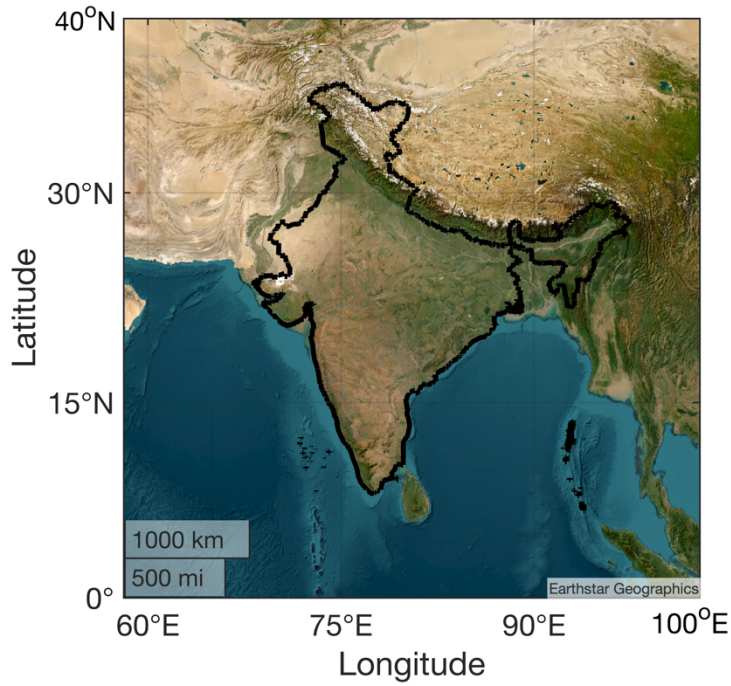

Figure S1: Domain used in simulations of CLM5 for regional experiments

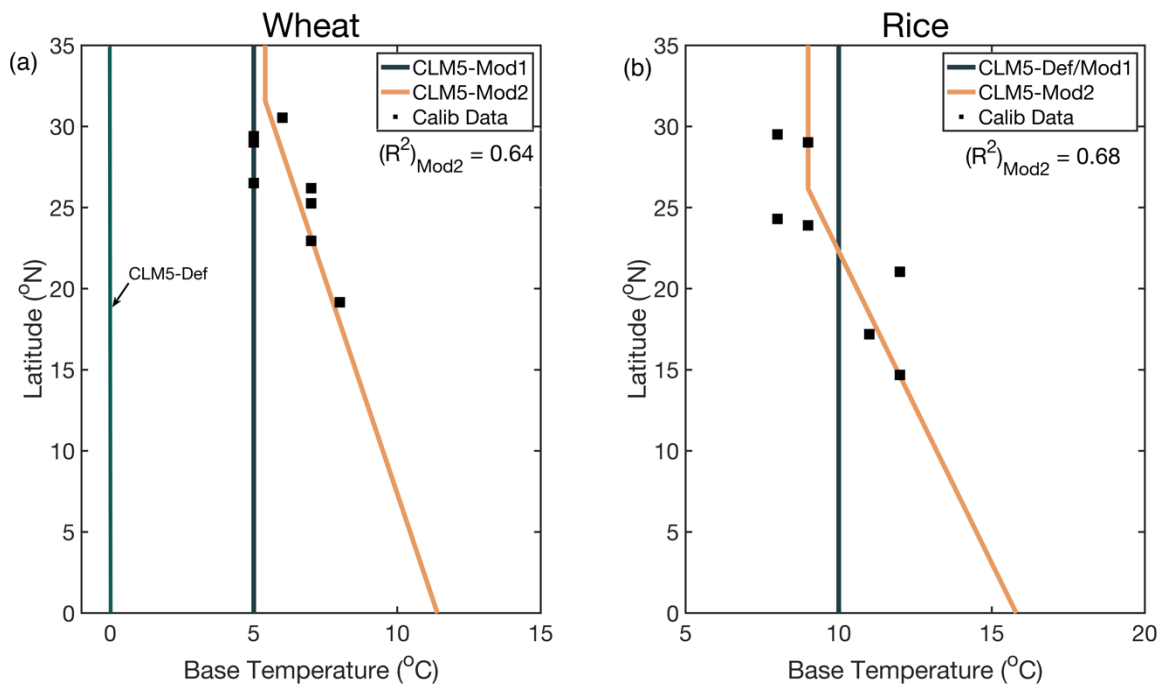

Figure S2: Latitudinal variation in base temperature calibration (a) Wheat, and (b) Rice

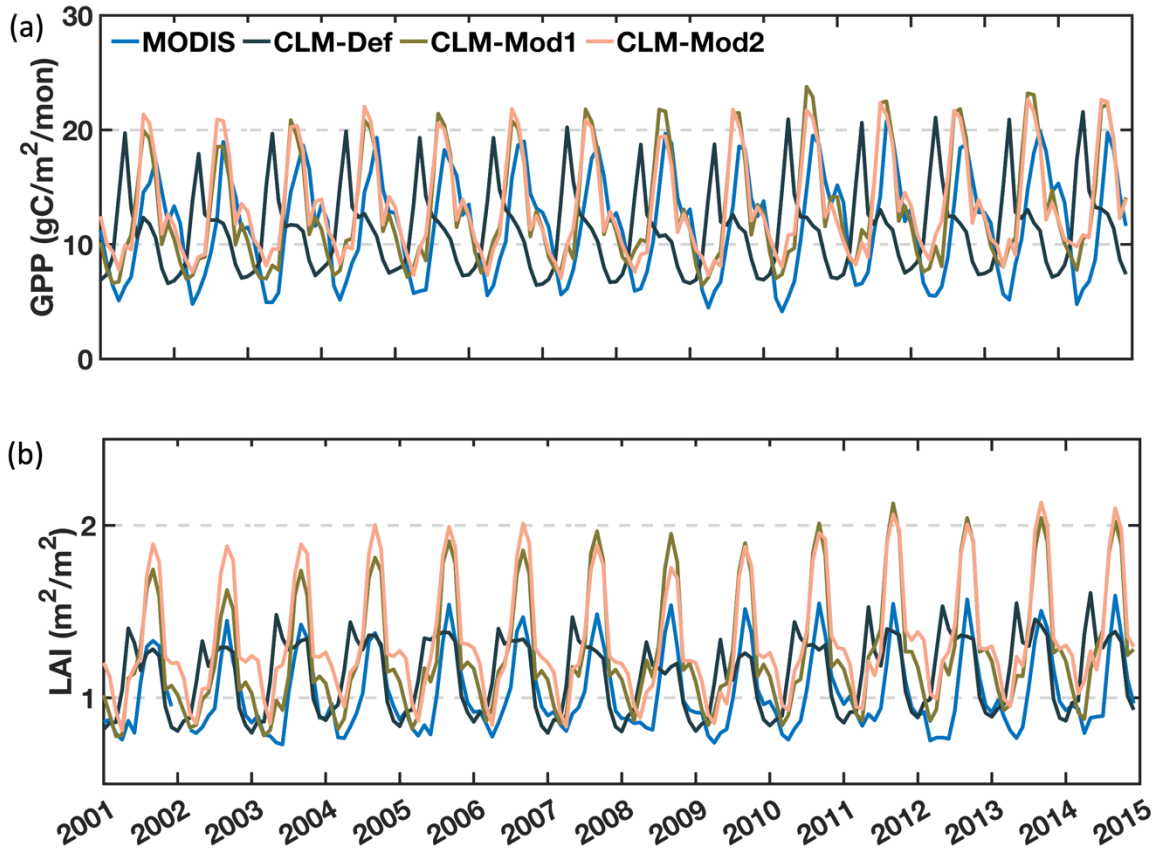

Figure S3: Comparison of MODIS (a) GPP and (b) LAI with CLM5 three setups over the period 2001 to 2014

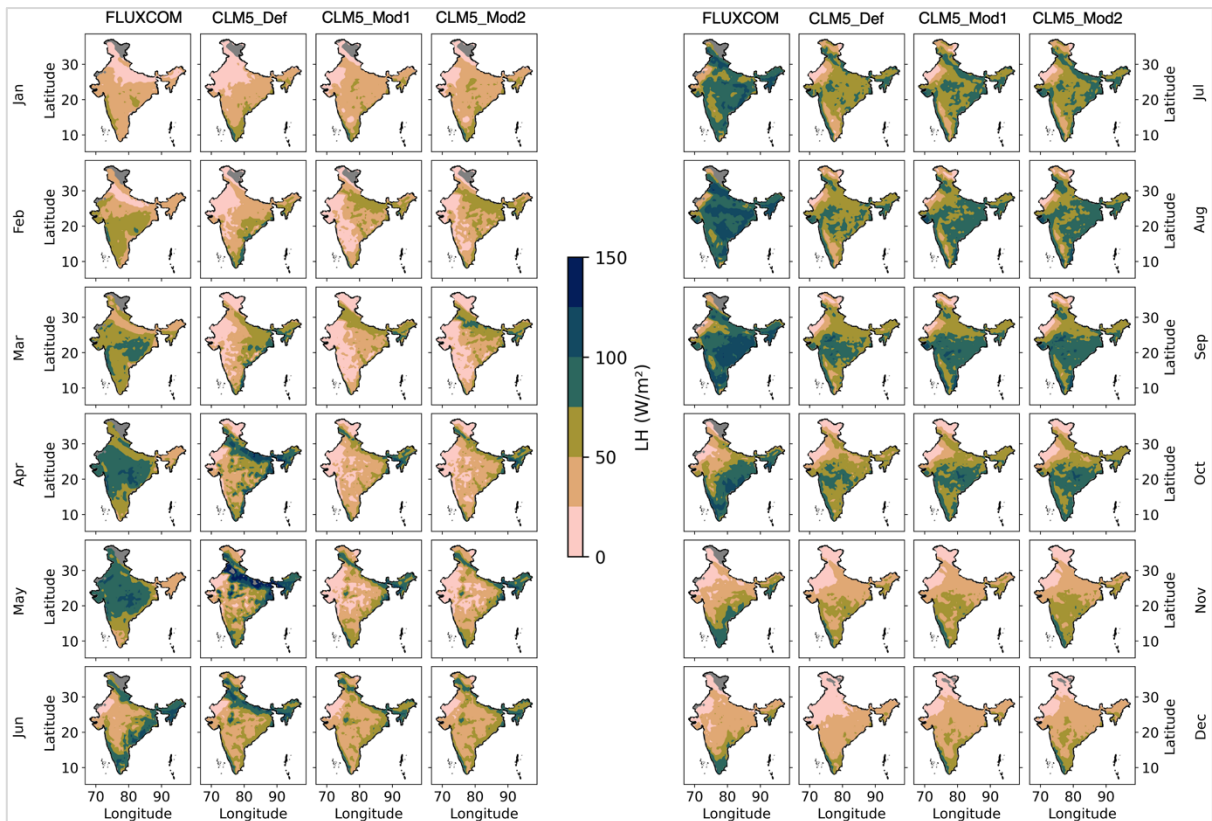

Figure S4: Comparison of FLUXCOM Latent Heat product against the three setups of CLM5. Data shown here is monthly average taken over the period 2001 to 2014

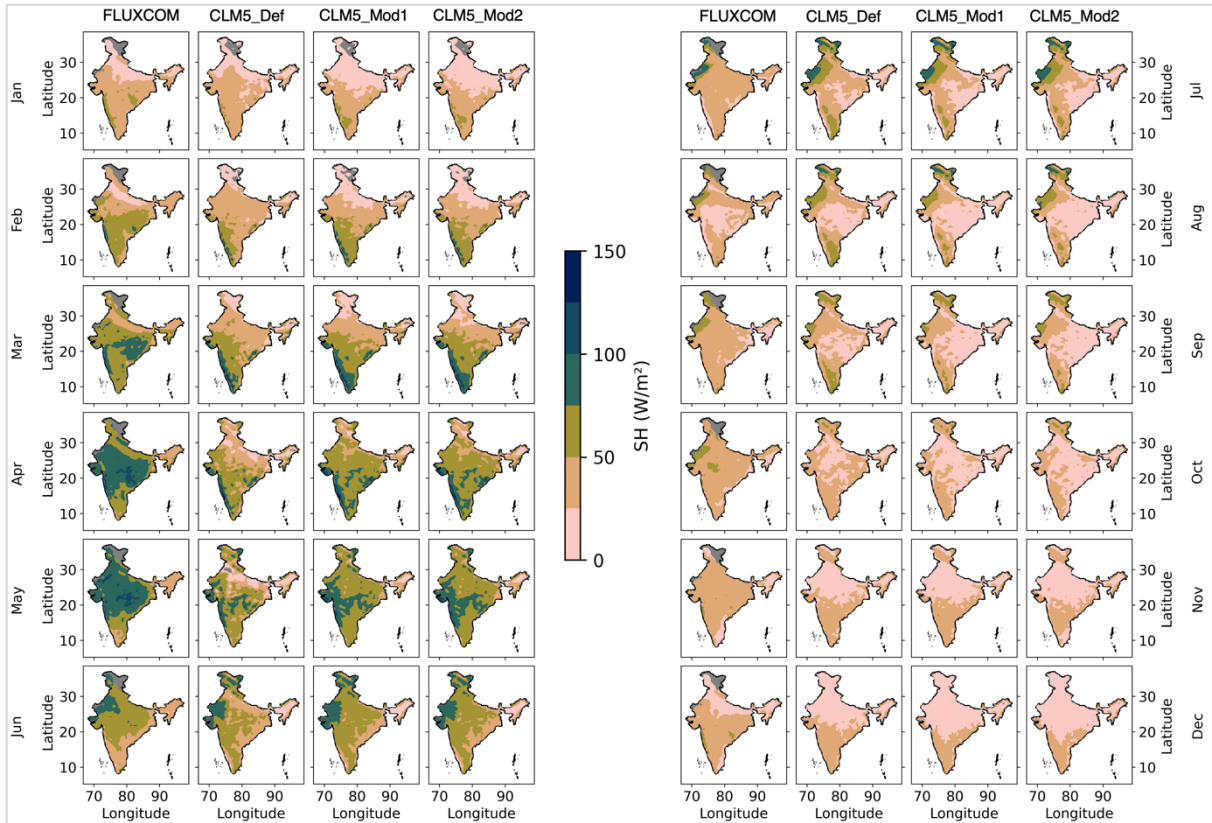

Figure S5: Comparison of FLUXCOM Sensible Heat product against the three setups of CLM5. Data shown here is monthly average taken over the period 2001 to 2014

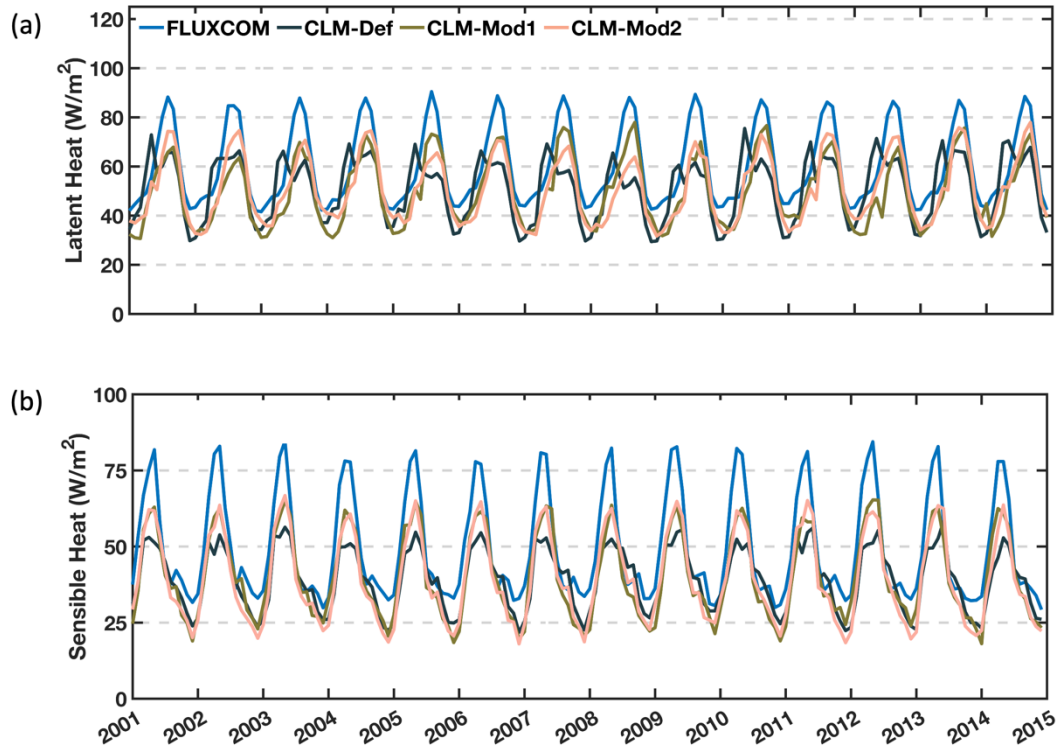

Figure S6: Comparison of FLUXCOM (a) Latent Heat and (b) Sensible Heat with CLM5 three setups over the period 2001 to 2014

### CLM5 Crop Areas (Mean of 2000 to 2014)

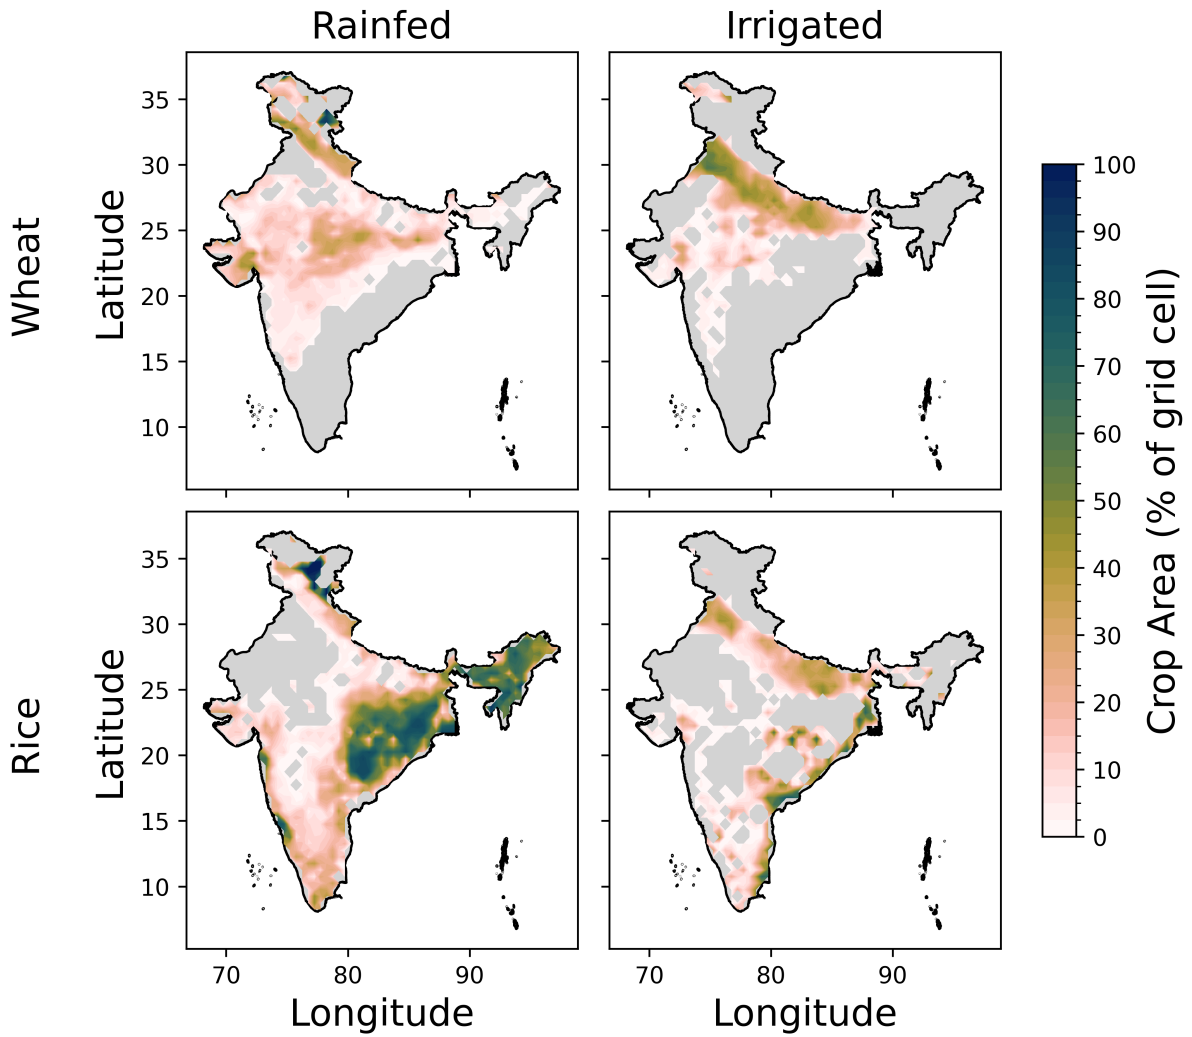

Figure S7: Crop areas of Wheat and Rice used in CLM5

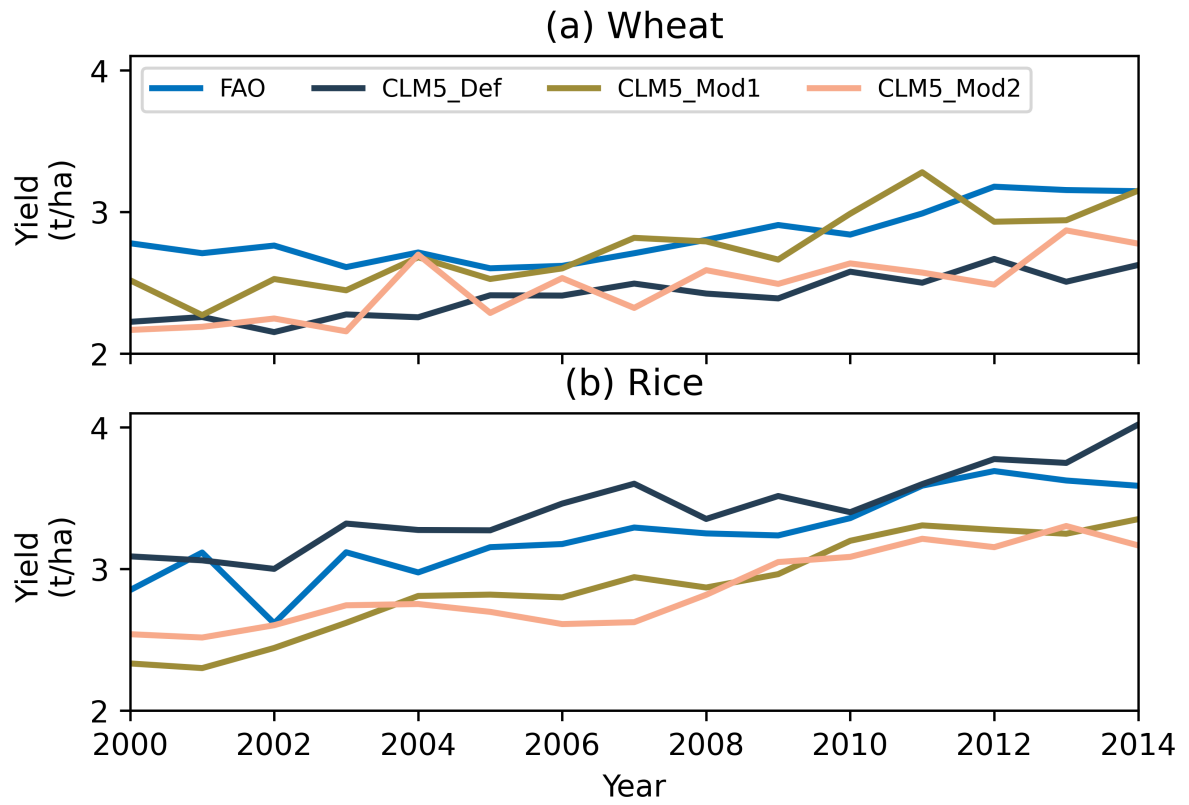

Figure S8: Comparing the total yield of (a) Wheat and (b) Rice against the FAO data from 2000 to 2014
